# Supplementary material for: Identification and characterization of pathogen recognition genes families in Gastrodia elata: Insights into their roles in growth and disease resistance
Source: Research Square preprint supplement (doi:10.21203/rs.3.rs-7424538/v1), 2025-10-23
Supplement: Supplementary file 1 [file 4966f367a81b1f465da29565.xlsx]

## Sheet: Table S1
Table S1 : The genomic information for 10 genomes of land plants has been sourced.
Group	Order	Family	Genus	Species	Download
Angiosperms	Asparagales	Orchidaceae	Gastrodia	Gastrodia elata	Genomic data were measured by our research group.
Angiosperms	Asparagales	Orchidaceae	Angraecum	Angraecum sesquipedale	https://ngdc.cncb.ac.cn/gwh/Assembly/88029/show
Angiosperms	Asparagales	Orchidaceae	Dendrobium	Dendrobium chrysotoxum	https://ngdc.cncb.ac.cn/gwh/ncbi_assembly/56717/show
Angiosperms	Asparagales	Orchidaceae	Dendrobium	Dendrobium nobile	https://ngdc.cncb.ac.cn/gwh/Genome/19114/show
Angiosperms	Asparagales	Orchidaceae	Platanthera	Platanthera guangdongensis	https://ngdc.cncb.ac.cn/gwh/ncbi_assembly/2362645/show
Angiosperms	Asparagales	Orchidaceae	Platanthera	Platanthera zijinensis	https://ngdc.cncb.ac.cn/gwh/ncbi_assembly/2358411/show
Angiosperms	Asparagales	Orchidaceae	Vanilla	Vanilla planifolia	https://ngdc.cncb.ac.cn/gwh/ncbi_assembly/56415/show
Angiosperms	Poales	Poaceae	Oryza	Oryza sativa	https://phytozome-next.jgi.doe.gov/info/Osativa_v7_0
Angiosperms	Brassicales	Brassicaceae	Arabidopsis	Arabidopsis thaliana	https://phytozome-next.jgi.doe.gov/info/Athaliana_TAIR10

## Sheet: Table S2
Table S2 : The physical and chemical parameters of identified GePRGs in G. elata.
Gene name	Rename	Number of Amino Acid	Molecular Weight	Theoretical pI	Instability Index	Aliphatic Index	Grand Average of Hydropathicity	Cellular Localization
Gae_00012.1	GeLRR-RLK1	989	107858	7.21	37.19	104.73	0.061	Plasma Membrane
Gae_00235.1	GeLRR-RLK2	916	100713	6.15	36.96	94.81	-0.142	Nucleus
Gae_00575.1	GeLRR-RLK3	923	98813.1	5.84	35.13	89.71	-0.068	Plasma Membrane
Gae_01713.1	GeLRR-RLK4	897	98363.3	6.5	38.54	101.98	0.044	Plasma Membrane
Gae_01892.1	GeLRR-RLK5	957	103020	6.03	35.67	111.11	0.183	Plasma Membrane
Gae_03223.1	GeLRR-RLK6	1084	118866	5.9	32.86	109.22	0.098	Chloroplast
Gae_03348.1	GeLRR-RLK7	956	104932	5.82	29.42	102.7	-0.057	Nucleus
Gae_04202.1	GeLRR-RLK8	1109	120804	6.64	45.95	101.16	0.087	Plasma Membrane
Gae_04569.1	GeLRR-RLK9	1014	107785	5.91	43.08	104.08	0.096	Plasma Membrane
Gae_05661.1	GeLRR-RLK10	1046	114381	6.59	39.72	99.64	-0.004	Vacuole
Gae_05773.1	GeLRR-RLK11	1104	120816	5.57	36.03	111.5	0.135	Plasma Membrane
Gae_05848.1	GeLRR-RLK12	1651	176778	5.91	39.91	100.09	0.042	Plasma Membrane
Gae_06299.1	GeLRR-RLK13	964	104344	8.28	39.8	108.01	0.101	Extracellular
Gae_07109.1	GeLRR-RLK14	982	106336	8.68	46.32	106.6	0.06	Plasma Membrane
Gae_07549.1	GeLRR-RLK15	957	103875	7.19	35.31	102.68	0.062	Plasma Membrane
Gae_07550.1	GeLRR-RLK16	945	105338	6.42	39.96	104.33	-0.014	Chloroplast
Gae_07873.1	GeLRR-RLK17	1010	112052	5.65	30.68	94.11	-0.139	Plasma Membrane
Gae_09088.1	GeLRR-RLK18	1315	142687	5.6	31.81	100.87	0.044	Vacuole
Gae_09133.1	GeLRR-RLK19	986	106961	6.34	33.58	103.86	0.073	Chloroplast
Gae_09134.1	GeLRR-RLK20	952	104728	7.81	36.49	109.46	0.017	Plasma Membrane
Gae_09323.1	GeLRR-RLK21	1084	116372	8.24	34.82	101.08	0.063	Plasma Membrane
Gae_09405.1	GeLRR-RLK22	1028	110823	6.25	39.96	104.19	0.099	Plasma Membrane
Gae_09589.1	GeLRR-RLK23	1155	125913	5.83	39.67	108.91	0.136	Plasma Membrane
Gae_09674.1	GeLRR-RLK24	1202	128151	5.52	34.95	100.62	0.093	Plasma Membrane
Gae_10317.1	GeLRR-RLK25	1016	110371	5.77	39.9	100.88	0.01	Plasma Membrane
Gae_10513.1	GeLRR-RLK26	949	102699	7.75	37.33	109.45	0.142	Chloroplast
Gae_10539.1	GeLRR-RLK27	1227	132214	7.29	42.52	110.2	0.036	Plasma Membrane
Gae_10771.1	GeLRR-RLK28	980	107047	5.59	36.21	103.98	-0.021	Plasma Membrane
Gae_10925.1	GeLRR-RLK29	1055	115733	8.27	39.2	103.06	0.056	Plasma Membrane
Gae_11092.1	GeLRR-RLK30	948	101798	5.96	37.84	95.17	-0.03	Plasma Membrane
Gae_11867.1	GeLRR-RLK31	1005	108322	6.31	36.88	106.77	0.072	Chloroplast
Gae_12323.1	GeLRR-RLK32	1034	113207	6.48	39.17	102.33	0.052	Plasma Membrane
Gae_12576.1	GeLRR-RLK33	1127	122664	5.84	39.62	101.87	0.012	Plasma Membrane
Gae_12618.1	GeLRR-RLK34	1226	135223	6.54	39.1	90.67	-0.146	Plasma Membrane
Gae_12641.1	GeLRR-RLK35	1163	125911	6.15	37.68	116.38	0.183	Plasma Membrane
Gae_13512.1	GeLRR-RLK36	1040	114776	7.89	36.51	93.66	-0.053	Plasma Membrane
Gae_13631.1	GeLRR-RLK37	1000	110162	6.51	26.2	94.95	-0.092	Vacuole
Gae_14153.1	GeLRR-RLK38	1198	129697	5.95	29.8	102.37	0.055	Nucleus
Gae_14452.1	GeLRR-RLK39	990	108721	6.85	30.45	109.47	0.099	Chloroplast
Gae_14453.1	GeLRR-RLK40	1093	120758	6.82	36.11	107.88	0.078	Plasma Membrane
Gae_16044.1	GeLRR-RLK41	992	107413	7.5	39.87	102.46	0.061	Plasma Membrane
Gae_17981.1	GeLRR-RLK42	1038	113135	5.94	34.22	100.97	0.07	Plasma Membrane
Gae_06268.1	GeLec-RLK1	801	88626.7	5.54	40.54	78.51	-0.237	Plasma Membrane
Gae_07728.1	GeLec-RLK2	676	73394.1	6.03	44.49	84.59	-0.151	Chloroplast
Gae_07893.1	GeLec-RLK3	689	75580.2	5.6	37.69	90.46	-0.056	Plasma Membrane
Gae_09242.1	GeLec-RLK4	762	84030.6	5.24	47.94	86.55	-0.056	Vacuole
Gae_09246.1	GeLec-RLK5	829	91916.8	6.33	41.79	94.22	0.024	Extracellular
Gae_09247.1	GeLec-RLK6	827	91772.5	6.53	41.88	90.54	-0.052	Plasma Membrane
Gae_09249.1	GeLec-RLK7	841	93397.5	7.93	35.5	93.22	-0.008	Plasma Membrane
Gae_11238.1	GeLec-RLK8	817	91165	7.95	47.39	84	-0.178	Extracellular
Gae_11401.1	GeLec-RLK9	692	75302.8	6.52	39.6	91.21	-0.044	Plasma Membrane
Gae_11402.1	GeLec-RLK10	753	82487.6	9.2	42.24	89.84	-0.094	Vacuole
Gae_11545.1	GeLec-RLK11	838	92068.7	6.55	48.3	79.63	-0.187	Mitochondria
Gae_13832.1	GeLec-RLK12	825	92853.4	6.87	30.55	86.11	-0.141	Chloroplast
Gae_13833.1	GeLec-RLK13	809	90958.1	6.86	36.27	83.34	-0.146	Plasma Membrane
Gae_15232.1	GeLec-RLK14	692	76334.2	5.86	37.56	91.3	-0.071	Chloroplast
Gae_15567.1	GeLec-RLK15	689	76508	5.08	40.78	82.02	-0.144	Extracellular
Gae_15603.1	GeLec-RLK16	828	92514.8	7.46	40.95	87.27	-0.131	Vacuole
Gae_15815.1	GeLec-RLK17	672	71775.9	6.93	43.92	94.12	0.079	Vacuole
Gae_16470.1	GeLec-RLK18	810	90378.8	8.8	41.1	89.52	-0.064	Plasma Membrane
Gae_18395.1	GeLec-RLK19	786	86338.7	6.08	39.71	87.68	-0.087	Chloroplast
Gae_19036.1	GeLec-RLK20	692	75511.1	6.09	35.86	96.17	-0.027	Plasma Membrane
Gae_05819.1	GeLYP1	365	38564.2	8.57	48.88	91.97	0.215	Chloroplast
Gae_11070.1	GeLYP2	416	43223	4.76	51.1	96.66	0.414	Plasma Membrane
Gae_12219.1	GeLYK1	611	66663.9	5.83	39.65	103.76	0.087	Plasma Membrane
Gae_14992.1	GeLYK2	598	65729.8	6.78	45.34	6.78	0.063	Plasma Membrane
Gae_05656.1	GeCNL1	1197	137284	6.12	43.88	100.05	-0.24	cytoskeleton
Gae_16934.1	GeCNL2	1054	118964	5.56	49.96	107.36	-0.05	cytoskeleton

## Sheet: Table S3
Table S3 : The GeLec-RLK genes were divided into G-type and L-type.
Type	Name
G-type GeLec-RLK	GeLec-RLK1
	GeLec-RLK4
	GeLec-RLK5
	GeLec-RLK6
	GeLec-RLK7
	GeLec-RLK8
	GeLec-RLK11
	GeLec-RLK12
	GeLec-RLK13
	GeLec-RLK16
	GeLec-RLK18
	GeLec-RLK19
L-type GeLec-RLK	GeLec-RLK2
	GeLec-RLK3
	GeLec-RLK9
	GeLec-RLK10
	GeLec-RLK14
	GeLec-RLK15
	GeLec-RLK17
	GeLec-RLK20

## Sheet: Table S4
Table S4 : The lengths of the 18 chromosomes of Gastrodia elata have been statistically analyzed.
Chromosome	Length(Mb)	Chromosome	Length(Mb)
Chr01	135754555	Chr10	53721572
Chr02	110630697	Chr11	50514822
Chr03	74801227	Chr12	43866999
Chr04	72940177	Chr13	45769636
Chr05	64137727	Chr14	45889329
Chr06	53447974	Chr15	43550880
Chr07	56091069	Chr16	38171787
Chr08	54360032	Chr17	38218376
Chr09	53017372	Chr18	36080981

## Sheet: Table S5
Table S5 : The tandem and collinear gene pairs were identified in the Gastrodia elata genome.
Type	Gene pair	Chromosomal location
Tandem	GeLec-RLK9/GeLec-RLK10	Chr10/Chr10
	GeLec-RLK12/GeLec-RLK13	Chr12/Chr12
	GeLRR-RLK39/GeLRR-RLK40	Chr13/Chr13
	GeLRR-RLK15/GeLRR-RLK16	Chr06/Chr06
	GeLRR-RLK19/GeLRR-RLK20	Chr07/Chr07
	GeLec-RLK5/GeLec-RLK6	Chr07/Chr07
Collinear	GeLec-RLK9/GeLec-RLK14	Chr10/Chr14

## Sheet: Table S6
Table S6 : Results of collinear genes between 68 pathogen recognition genes in Gastrodia elata and those in eight other plant species.
G. elata vs Angraecum sesquipedale		G. elata vs Dendrobium chrysotoxum		G. elata vs Dendrobium nobile		G. elata vs Platanthera guangdongensis		G. elata vs Platanthera zijinensis		G. elata vs Vanilla planifolia		G. elata vs Oryza sativa		G. elata vs Arabidopsis thaliana
G. elata	A. sesquipedale	G. elata	D. chrysotoxum	G. elata	D. nobile	G. elata	P guangdongensis	G. elata	P. zijinensis	G. elata	V. planifolia	G. elata	O. sativa	G. elata	A. thaliana
GeLRR-RLK2	ASE05G01121	GeLRR-RLK1	rna-gnl|WGS:JAGFBR|Maker88913	GeLRR-RLK1	rna-gnl|WGS:JAGYWB|Dnobile04G00470.1	GeLRR-RLK1	rna-gnl|WGS:JBBWWR|PGU013120_mrna	GeLRR-RLK1	rna-gnl|WGS:JBBWWQ|PZI001828_mrna	GeLRR-RLK1	rna-gnl|WGS:JADCNL|Vpl13Ag23878.1	GeLRR-RLK2	LOC_Os03g21230.1.MSUv7.0	GeLRR-RLK8	AT1G69270.1.Araport11.447
GeLRR-RLK2	ASE07G00793	GeLRR-RLK2	rna-gnl|WGS:JAGFBR|Maker124665	GeLRR-RLK2	rna-gnl|WGS:JAGYWB|Dnobile01G00918.1	GeLRR-RLK2	rna-gnl|WGS:JBBWWR|PGU008977_mrna	GeLRR-RLK2	rna-gnl|WGS:JBBWWQ|PZI017622_mrna	GeLRR-RLK1	rna-gnl|WGS:JADCNL|Vpl13Ag23840.1	GeLRR-RLK2	LOC_Os05g40770.1.MSUv7.0	GeLRR-RLK8	AT3G02130.1.Araport11.447
GeLRR-RLK3	ASE01G01622	GeLRR-RLK2	rna-gnl|WGS:JAGFBR|Maker94078	GeLRR-RLK2	rna-gnl|WGS:JAGYWB|Dnobile06G01471.1	GeLRR-RLK4	rna-gnl|WGS:JBBWWR|PGU008814_mrna	GeLRR-RLK4	rna-gnl|WGS:JBBWWQ|PZI001322_mrna	GeLRR-RLK2	rna-gnl|WGS:JADCNL|Vpl03Ag06683.1	GeLRR-RLK4	LOC_Os03g21230.1.MSUv7.0	GeLRR-RLK14	AT2G24130.2.Araport11.447
GeLRR-RLK4	ASE05G01121	GeLRR-RLK2	rna-gnl|WGS:JAGFBR|Maker57460	GeLRR-RLK2	rna-gnl|WGS:JAGYWB|Dnobile12G00691.1	GeLRR-RLK4	rna-gnl|WGS:JBBWWR|PGU008977_mrna	GeLRR-RLK6	rna-gnl|WGS:JBBWWQ|PZI008415_mrna	GeLRR-RLK3	rna-gnl|WGS:JADCNL|Vpl02Ag06222.1	GeLRR-RLK7	LOC_Os06g03970.1.MSUv7.0	GeLRR-RLK15	AT1G09970.2.Araport11.447
GeLRR-RLK4	ASE12G00886	GeLRR-RLK3	rna-gnl|WGS:JAGFBR|Maker73542	GeLRR-RLK3	rna-gnl|WGS:JAGYWB|Dnobile18G01380.1	GeLRR-RLK7	rna-gnl|WGS:JBBWWR|PGU013897_mrna	GeLRR-RLK7	rna-gnl|WGS:JBBWWQ|PZI008512_mrna	GeLRR-RLK4	rna-gnl|WGS:JADCNL|Vpl03Ag06683.1	GeLRR-RLK8	LOC_Os07g41140.1.MSUv7.0	GeLRR-RLK30	AT2G01820.1.Araport11.447
GeLRR-RLK6	ASE08G00958	GeLRR-RLK4	rna-gnl|WGS:JAGFBR|Maker124665	GeLRR-RLK4	rna-gnl|WGS:JAGYWB|Dnobile01G00924.1	GeLRR-RLK8	rna-gnl|WGS:JBBWWR|PGU007094_mrna	GeLRR-RLK8	rna-gnl|WGS:JBBWWQ|PZI012095_mrna	GeLRR-RLK6	rna-gnl|WGS:JADCNL|Vpl01Ag01743.1	GeLRR-RLK14	LOC_Os06g08690.1.MSUv7.0	GeLec-RLK9	AT2G37710.1.Araport11.447
GeLRR-RLK7	ASE08G00828	GeLRR-RLK4	rna-gnl|WGS:JAGFBR|Maker94105	GeLRR-RLK4	rna-gnl|WGS:JAGYWB|Dnobile06G01471.1	GeLRR-RLK10	rna-gnl|WGS:JBBWWR|PGU005047_mrna	GeLRR-RLK10	rna-gnl|WGS:JBBWWQ|PZI012945_mrna	GeLRR-RLK7	rna-gnl|WGS:JADCNL|Vpl01Ag03295.1	GeLRR-RLK14	LOC_Os09g25540.1.MSUv7.0	GeLec-RLK9	AT3G53810.1.Araport11.447
GeLRR-RLK8	ASE13G00090	GeLRR-RLK6	rna-gnl|WGS:JAGFBR|Maker67015	GeLRR-RLK6	rna-gnl|WGS:JAGYWB|Dnobile13G01458.1	GeLRR-RLK12	rna-gnl|WGS:JBBWWR|PGU010861_mrna	GeLYP1	rna-gnl|WGS:JBBWWQ|PZI013220_mrna	GeLRR-RLK8	rna-gnl|WGS:JADCNL|Vpl12Ag23634.1	GeLec-RLK2	LOC_Os08g40270.1.MSUv7.0	GeLec-RLK11	AT4G00340.1.Araport11.447
GeLRR-RLK9	ASE08G01143	GeLRR-RLK7	rna-gnl|WGS:JAGFBR|Maker66700	GeLRR-RLK7	rna-gnl|WGS:JAGYWB|Dnobile13G01320.1	GeLRR-RLK15	rna-gnl|WGS:JBBWWR|PGU007925_mrna	GeLRR-RLK12	rna-gnl|WGS:JBBWWQ|PZI013263_mrna	GeLRR-RLK10	rna-gnl|WGS:JADCNL|Vpl03Ag07302.1	GeLRR-RLK18	LOC_Os01g68870.2.MSUv7.0	GeLec-RLK14	AT2G37710.1.Araport11.447
GeaCNL1	ASE03G01696	GeLRR-RLK8	rna-gnl|WGS:JAGFBR|Maker83780	GeLRR-RLK8	rna-gnl|WGS:JAGYWB|Dnobile04G01246.1	GeLRR-RLK16	rna-gnl|WGS:JBBWWR|PGU016629_mrna	GeLRR-RLK13	rna-gnl|WGS:JBBWWQ|PZI005617_mrna	GeLRR-RLK11	rna-gnl|WGS:JADCNL|Vpl12Ag22680.1	GeLec-RLK4	LOC_Os01g10710.1.MSUv7.0	GeLec-RLK14	AT3G53810.1.Araport11.447
GeLRR-RLK10	ASE19G00253	GeLRR-RLK8	rna-gnl|WGS:JAGFBR|Maker44161	GeLRR-RLK8	rna-gnl|WGS:JAGYWB|Dnobile07G01152.1	GeLec-RLK2	rna-gnl|WGS:JBBWWR|PGU002038_mrna	GeLRR-RLK14	rna-gnl|WGS:JBBWWQ|PZI020959_mrna	GeLRR-RLK13	rna-gnl|WGS:JADCNL|Vpl03Ag08132.1	GeLec-RLK4	LOC_Os02g13965.1.MSUv7.0
GeLRR-RLK11	ASE02G01401	GeLRR-RLK9	rna-gnl|WGS:JAGFBR|Maker107585	GeLRR-RLK9	rna-gnl|WGS:JAGYWB|Dnobile13G00020.1	GeLec-RLK3	rna-gnl|WGS:JBBWWR|PGU020983_mrna	GeLRR-RLK15	rna-gnl|WGS:JBBWWQ|PZI000289_mrna	GeLRR-RLK14	rna-gnl|WGS:JADCNL|Vpl07Ag15871.1	GeLRR-RLK22	LOC_Os01g13800.1.MSUv7.0
GeLRR-RLK11	ASE19G00390	GeLRR-RLK10	rna-gnl|WGS:JAGFBR|Maker77773	GeaCNL1	rna-gnl|WGS:JAGYWB|Dnobile09G02189.1	GeLec-RLK4	rna-gnl|WGS:JBBWWR|PGU009826_mrna	GeLRR-RLK15	rna-gnl|WGS:JBBWWQ|PZI000319_mrna	GeLRR-RLK15	rna-gnl|WGS:JADCNL|Vpl09Ag18803.1	GeLRR-RLK26	LOC_Os01g13800.1.MSUv7.0
GeLYP1	ASE19G00554	GeLRR-RLK11	rna-gnl|WGS:JAGFBR|Maker93498	GeLRR-RLK10	rna-gnl|WGS:JAGYWB|Dnobile08G00358.1	GeLRR-RLK22	rna-gnl|WGS:JBBWWR|PGU015470_mrna	GeLec-RLK2	rna-gnl|WGS:JBBWWQ|PZI000134_mrna	GeLRR-RLK16	rna-gnl|WGS:JADCNL|Vpl09Ag17687.1	GeLRR-RLK28	LOC_Os02g53720.1.MSUv7.0
GeLRR-RLK12	ASE19G00512	GeLRR-RLK11	rna-gnl|WGS:JAGFBR|Maker116477	GeLRR-RLK11	rna-gnl|WGS:JAGYWB|Dnobile08G00526.1	GeLRR-RLK23	rna-gnl|WGS:JBBWWR|PGU018229_mrna	GeLec-RLK3	rna-gnl|WGS:JBBWWQ|PZI018404_mrna	GeLec-RLK2	rna-gnl|WGS:JADCNL|Vpl09Ag18863.1	GeLYP2	LOC_Os02g53000.1.MSUv7.0
GeLec-RLK1	ASE14G00617	GeLYP1	rna-gnl|WGS:JAGFBR|Maker58250	GeLYP1	rna-gnl|WGS:JAGYWB|Dnobile08G00692.1	GeLRR-RLK24	rna-gnl|WGS:JBBWWR|PGU019164_mrna	GeLec-RLK4	rna-gnl|WGS:JBBWWQ|PZI010948_mrna	GeLec-RLK2	rna-gnl|WGS:JADCNL|Vpl09Ag18877.1	GeLYP2	LOC_Os09g27890.1.MSUv7.0
GeLRR-RLK13	ASE14G00584	GeLRR-RLK12	rna-gnl|WGS:JAGFBR|Maker58211	GeLRR-RLK12	rna-gnl|WGS:JAGYWB|Dnobile08G00640.1	GeLRR-RLK25	rna-gnl|WGS:JBBWWR|PGU021980_mrna	GeLRR-RLK21	rna-gnl|WGS:JBBWWQ|PZI010895_mrna	GeLec-RLK3	rna-gnl|WGS:JADCNL|Vpl10Ag19843.1	GeLRR-RLK30	LOC_Os03g50810.1.MSUv7.0
GeLRR-RLK15	ASE07G01103	GeLRR-RLK13	rna-gnl|WGS:JAGFBR|Maker106501	GeLec-RLK1	rna-gnl|WGS:JAGYWB|Dnobile05G00589.1	GeLRR-RLK26	rna-gnl|WGS:JBBWWR|PGU021852_mrna	GeLRR-RLK22	rna-gnl|WGS:JBBWWQ|PZI024201_mrna	GeLec-RLK4	rna-gnl|WGS:JADCNL|Vpl04Ag08754.1	GeLec-RLK9	LOC_Os12g38610.1.MSUv7.0
GeLRR-RLK16	ASE07G01102	GeLRR-RLK15	rna-gnl|WGS:JAGFBR|Maker69146	GeLRR-RLK13	rna-gnl|WGS:JAGYWB|Dnobile05G00620.1	GeLRR-RLK28	rna-gnl|WGS:JBBWWR|PGU003307_mrna	GeLRR-RLK23	rna-gnl|WGS:JBBWWQ|PZI024448_mrna	GeLec-RLK4	rna-gnl|WGS:JADCNL|Vpl11Ag21769.1	GeLRR-RLK34	LOC_Os04g52600.1.MSUv7.0
GeLec-RLK2	ASE07G00952	GeLRR-RLK15	rna-gnl|WGS:JAGFBR|Maker56294	GeLRR-RLK14	rna-gnl|WGS:JAGYWB|Dnobile11G01297.1	GeLRR-RLK29	rna-gnl|WGS:JBBWWR|PGU002383_mrna	GeLRR-RLK24	rna-gnl|WGS:JBBWWQ|PZI024114_mrna	GeLRR-RLK22	rna-gnl|WGS:JADCNL|Vpl13Ag23878.1	GeLRR-RLK35	LOC_Os04g52780.1.MSUv7.0
GeLec-RLK3	ASE07G00559	GeLRR-RLK16	rna-gnl|WGS:JAGFBR|Maker69132	GeLRR-RLK15	rna-gnl|WGS:JAGYWB|Dnobile03G00452.1	GeLRR-RLK30	rna-gnl|WGS:JBBWWR|PGU010836_mrna	GeLRR-RLK26	rna-gnl|WGS:JBBWWQ|PZI022967_mrna	GeLRR-RLK26	rna-gnl|WGS:JADCNL|Vpl11Ag21666.1	GeLRR-RLK36	LOC_Os01g60060.1.MSUv7.0
GeLRR-RLK18	ASE16G00040	GeLRR-RLK16	rna-gnl|WGS:JAGFBR|Maker56232	GeLRR-RLK15	rna-gnl|WGS:JAGYWB|Dnobile12G00321.1	GeLec-RLK9	rna-gnl|WGS:JBBWWR|PGU020983_mrna	GeLRR-RLK28	rna-gnl|WGS:JBBWWQ|PZI016453_mrna	GeLRR-RLK28	rna-gnl|WGS:JADCNL|Vpl01Ag04370.1	GeLRR-RLK38	LOC_Os10g32990.1.MSUv7.0
GeLRR-RLK19	ASE09G00509	GeLec-RLK2	rna-gnl|WGS:JAGFBR|Maker56603	GeLRR-RLK16	rna-gnl|WGS:JAGYWB|Dnobile03G00453.1	GeLRR-RLK32	rna-gnl|WGS:JBBWWR|PGU010918_mrna	GeLRR-RLK29	rna-gnl|WGS:JBBWWQ|PZI016535_mrna	GeLRR-RLK30	rna-gnl|WGS:JADCNL|Vpl06Ag13126.1	GeLec-RLK17	LOC_Os05g03450.1.MSUv7.0
GeLRR-RLK20	ASE09G00507	GeLec-RLK3	rna-gnl|WGS:JAGFBR|Maker56892	GeLRR-RLK16	rna-gnl|WGS:JAGYWB|Dnobile12G00324.1	GeLRR-RLK33	rna-gnl|WGS:JBBWWR|PGU018842_mrna	GeLRR-RLK30	rna-gnl|WGS:JBBWWQ|PZI016761_mrna	GeLec-RLK11	rna-gnl|WGS:JADCNL|Vpl14Ag25790.1
GeLec-RLK4	ASE13G00872	GeLRR-RLK19	rna-gnl|WGS:JAGFBR|Maker69146	GeLec-RLK2	rna-gnl|WGS:JAGYWB|Dnobile12G00501.1	GeLRR-RLK34	rna-gnl|WGS:JBBWWR|PGU022327_mrna	GeLec-RLK11	rna-gnl|WGS:JBBWWQ|PZI000653_mrna	GeLYK1	rna-gnl|WGS:JADCNL|Vpl02Ag06406.1
GeLRR-RLK21	ASE13G00928	GeLRR-RLK20	rna-gnl|WGS:JAGFBR|Maker69132	GeLec-RLK3	rna-gnl|WGS:JAGYWB|Dnobile12G00950.1	GeLRR-RLK35	rna-gnl|WGS:JBBWWR|PGU021907_mrna	GeLRR-RLK32	rna-gnl|WGS:JBBWWQ|PZI011353_mrna	GeLRR-RLK33	rna-gnl|WGS:JADCNL|Vpl08Ag16705.1
GeLRR-RLK23	ASE04G01289	GeLRR-RLK21	rna-gnl|WGS:JAGFBR|Maker69453	GeLRR-RLK18	rna-gnl|WGS:JAGYWB|Dnobile01G00277.1	GeLRR-RLK37	rna-gnl|WGS:JBBWWR|PGU005662_mrna	GeLRR-RLK33	rna-gnl|WGS:JBBWWQ|PZI020422_mrna	GeLRR-RLK34	rna-gnl|WGS:JADCNL|Vpl02Ag05931.1
GeLRR-RLK24	ASE04G00519	GeLRR-RLK22	rna-gnl|WGS:JAGFBR|Maker86222	GeLRR-RLK19	rna-gnl|WGS:JAGYWB|Dnobile03G00452.1	GeLYK2	rna-gnl|WGS:JBBWWR|PGU021227_mrna	GeLRR-RLK34	rna-gnl|WGS:JBBWWQ|PZI020466_mrna	GeLRR-RLK36	rna-gnl|WGS:JADCNL|Vpl09Ag18075.1
GeLRR-RLK25	ASE18G00939	GeLRR-RLK25	rna-gnl|WGS:JAGFBR|Maker120891	GeLRR-RLK20	rna-gnl|WGS:JAGYWB|Dnobile03G00453.1	GeLec-RLK14	rna-gnl|WGS:JBBWWR|PGU014038_mrna	GeLRR-RLK35	rna-gnl|WGS:JBBWWQ|PZI020483_mrna	GeLRR-RLK36	rna-gnl|WGS:JADCNL|Vpl_s069Ag26672.1
GeLRR-RLK26	ASE04G00413	GeLRR-RLK25	rna-gnl|WGS:JAGFBR|Maker105523	GeLec-RLK4	rna-gnl|WGS:JAGYWB|Dnobile04G00198.1	GeLec-RLK14	rna-gnl|WGS:JBBWWR|PGU002613_mrna	GeLRR-RLK37	rna-gnl|WGS:JBBWWQ|PZI005715_mrna	GeLRR-RLK37	rna-gnl|WGS:JADCNL|Vpl12Ag22984.1
GeLRR-RLK28	ASE02G00623	GeLRR-RLK26	rna-gnl|WGS:JAGFBR|Maker119727	GeLec-RLK4	rna-gnl|WGS:JAGYWB|Dnobile19G00122.1	GeLec-RLK14	rna-gnl|WGS:JBBWWR|PGU020983_mrna	GeLRR-RLK38	rna-gnl|WGS:JBBWWQ|PZI012867_mrna	GeLec-RLK14	rna-gnl|WGS:JADCNL|Vpl01Ag01677.1
GeLRR-RLK28	ASE06G00900	GeLRR-RLK26	rna-gnl|WGS:JAGFBR|Maker86222	GeLRR-RLK22	rna-gnl|WGS:JAGYWB|Dnobile19G01162.1	GeLec-RLK16	rna-gnl|WGS:JBBWWR|PGU018543_mrna	GeLYK2	rna-gnl|WGS:JBBWWQ|PZI022894_mrna	GeLec-RLK14	rna-gnl|WGS:JADCNL|Vpl05Ag12604.1
GeLRR-RLK29	ASE02G00562	GeLRR-RLK28	rna-gnl|WGS:JAGFBR|Maker115504	GeLRR-RLK23	rna-gnl|WGS:JAGYWB|Dnobile19G00078.1	GeLRR-RLK41	rna-gnl|WGS:JBBWWR|PGU013561_mrna	GeLRR-RLK41	rna-gnl|WGS:JBBWWQ|PZI014974_mrna	GeLec-RLK14	rna-gnl|WGS:JADCNL|Vpl06Ag14296.1
GeLRR-RLK29	ASE17G00696	GeLRR-RLK29	rna-gnl|WGS:JAGFBR|Maker92732	GeLRR-RLK24	rna-gnl|WGS:JAGYWB|Dnobile19G01044.1	GeLRR-RLK41	rna-gnl|WGS:JBBWWR|PGU016986_mrna	GeLec-RLK18	rna-gnl|WGS:JBBWWQ|PZI010008_mrna	GeLec-RLK16	rna-gnl|WGS:JADCNL|Vpl06Ag14092.1
GeLRR-RLK30	ASE02G00340	GeLRR-RLK29	rna-gnl|WGS:JAGFBR|Maker61378	GeLRR-RLK25	rna-gnl|WGS:JAGYWB|Dnobile07G01195.1	GeLRR-RLK41	rna-gnl|WGS:JBBWWR|PGU013561_mrna	GeaCNL2	rna-gnl|WGS:JBBWWQ|PZI014707_mrna
GeLRR-RLK30	ASE10G00142	GeLRR-RLK30	rna-gnl|WGS:JAGFBR|Maker82520	GeLRR-RLK25	rna-gnl|WGS:JAGYWB|Dnobile18G02045.1	GeaCNL2	rna-gnl|WGS:JBBWWR|PGU009361_mrna	GeLRR-RLK42	rna-gnl|WGS:JBBWWQ|PZI002456_mrna
GeLec-RLK9	ASE03G01234	GeLRR-RLK30	rna-gnl|WGS:JAGFBR|Maker58477	GeLRR-RLK26	rna-gnl|WGS:JAGYWB|Dnobile04G00470.1	GeLRR-RLK42	rna-gnl|WGS:JBBWWR|PGU008037_mrna	GeLec-RLK19	rna-gnl|WGS:JBBWWQ|PZI021389_mrna
GeLec-RLK9	ASE12G01041	GeLec-RLK9	rna-gnl|WGS:JAGFBR|Maker93431	GeLRR-RLK26	rna-gnl|WGS:JAGYWB|Dnobile16G01353.1	GeLec-RLK19	rna-gnl|WGS:JBBWWR|PGU010698_mrna
GeLec-RLK10	ASE03G01233	GeLec-RLK9	rna-gnl|WGS:JAGFBR|Maker99744	GeLRR-RLK26	rna-gnl|WGS:JAGYWB|Dnobile19G01162.1
GeLec-RLK11	ASE03G01030	GeLec-RLK10	rna-gnl|WGS:JAGFBR|Maker93394	GeLRR-RLK28	rna-gnl|WGS:JAGYWB|Dnobile17G01201.1
GeLYK1	ASE01G00664	GeLec-RLK11	rna-gnl|WGS:JAGFBR|Maker63482	GeLRR-RLK29	rna-gnl|WGS:JAGYWB|Dnobile14G00835.1
GeLRR-RLK32	ASE01G00894	GeLYK1	rna-gnl|WGS:JAGFBR|Maker02613	GeLRR-RLK29	rna-gnl|WGS:JAGYWB|Dnobile17G01274.1
GeLRR-RLK33	ASE06G01236	GeLRR-RLK33	rna-gnl|WGS:JAGFBR|Maker54285	GeLYP2	rna-gnl|WGS:JAGYWB|Dnobile17G01575.1
GeLRR-RLK34	ASE06G01178	GeLRR-RLK34	rna-gnl|WGS:JAGFBR|Maker54249	GeLRR-RLK30	rna-gnl|WGS:JAGYWB|Dnobile10G00189.1
GeLRR-RLK35	ASE06G01161	GeLRR-RLK35	rna-gnl|WGS:JAGFBR|Maker54246	GeLRR-RLK30	rna-gnl|WGS:JAGYWB|Dnobile17G01588.1
GeLRR-RLK36	ASE05G00619	GeLRR-RLK36	rna-gnl|WGS:JAGFBR|Maker106715	GeLec-RLK8	rna-gnl|WGS:JAGYWB|Dnobile17G01819.1
GeLRR-RLK37	ASE06G00136	GeLRR-RLK37	rna-gnl|WGS:JAGFBR|mrna.IEQ34_029078	GeLec-RLK9	rna-gnl|WGS:JAGYWB|Dnobile09G00032.1
GeLYK2	ASE04G00980	GeLec-RLK14	rna-gnl|WGS:JAGFBR|Maker93394	GeLec-RLK9	rna-gnl|WGS:JAGYWB|Dnobile15G01217.1
GeLec-RLK14	ASE03G01233	GeLec-RLK14	rna-gnl|WGS:JAGFBR|Maker56892	GeLec-RLK10	rna-gnl|WGS:JAGYWB|Dnobile09G00035.1
GeLec-RLK14	ASE12G01041	GeLec-RLK14	rna-gnl|WGS:JAGFBR|Maker99744	GeLec-RLK10	rna-gnl|WGS:JAGYWB|Dnobile15G01215.1
GeLec-RLK17	ASE12G00317	GeLRR-RLK41	rna-gnl|WGS:JAGFBR|Maker91445	GeLec-RLK11	rna-gnl|WGS:JAGYWB|Dnobile09G00274.1
GeLRR-RLK41	ASE17G00848	GeLec-RLK18	rna-gnl|WGS:JAGFBR|Maker60465	GeLYK1	rna-gnl|WGS:JAGYWB|Dnobile18G00359.1
GeLRR-RLK41	ASE17G00848	GeLRR-RLK42	rna-gnl|WGS:JAGFBR|Maker22042	GeLRR-RLK32	rna-gnl|WGS:JAGYWB|Dnobile18G00105.1
GeLec-RLK18	ASE17G00471			GeLRR-RLK33	rna-gnl|WGS:JAGYWB|Dnobile16G00189.1
GeLRR-RLK42	ASE11G00127			GeLRR-RLK34	rna-gnl|WGS:JAGYWB|Dnobile16G00243.1
				GeLRR-RLK35	rna-gnl|WGS:JAGYWB|Dnobile16G00274.1
				GeLRR-RLK36	rna-gnl|WGS:JAGYWB|Dnobile06G00795.1
				GeLRR-RLK37	rna-gnl|WGS:JAGYWB|Dnobile16G01602.1
				GeLYK2	rna-gnl|WGS:JAGYWB|Dnobile19G00431.1
				GeLec-RLK14	rna-gnl|WGS:JAGYWB|Dnobile09G00035.1
				GeLec-RLK14	rna-gnl|WGS:JAGYWB|Dnobile12G00949.1
				GeLec-RLK14	rna-gnl|WGS:JAGYWB|Dnobile15G01215.1
				GeLec-RLK17	rna-gnl|WGS:JAGYWB|Dnobile15G00264.1
				GeLRR-RLK41	rna-gnl|WGS:JAGYWB|Dnobile14G01009.1
				GeLec-RLK18	rna-gnl|WGS:JAGYWB|Dnobile14G00601.1
				GeLRR-RLK42	rna-gnl|WGS:JAGYWB|Dnobile11G01512.1

## Sheet: Table S7
Table S7 : Putative cis-acting elements identified in the promoter regions of 68 GeRRGs.
		Light reponsive elements																											Hormone response elements												Development related elements
Gene Family	Name	3-AF1 binding site	AAAC-motif	ACA-motif	ACE	AE-box	AT1-motif	ATC-motif	ATCT-motif	Box 4	Box II	chs-CMA1a	chs-CMA2a	GA-motif	Gap-box	GATA-motif	G-box	GT1-motif	GTGGC-motif	I-box	LAMP-element	L-box	MRE	Sp1	TCCC-motif	TCT-motif	4cl-CMA1b	LS7	ABRE	AuxRR-core	CGTCA-motif	ERE	GARE-motif	P-box	SARE	TATC-box	TCA-element	TGA-box	TGA-element	TGACG-motif	AACA_motif	AP-1	CAT-box	CCGTCC-box	circadian	dOCT	GCN4_motif	HD-Zip 1	MSA-like
GeLRR-RLKs	GeLRR-RLK1					1				2				2				1						1	1		1				1	2				1				1				1
	GeLRR-RLK2									4			1				3			1						3			3		3	3	3	1		1	1	1		3
	GeLRR-RLK3									3	1			2			2			2			1						2		2	3		1						2	1
	GeLRR-RLK4					1	1		1	3				1				2		1					1						1	3		1					1	1
	GeLRR-RLK5					1				3						1	3	1		1				1		2			2			1					1	1					1					1	1
	GeLRR-RLK6									2				1		1	8							2					6		1	2	1			1			1	1			1		1
	GeLRR-RLK7				1		1		1	12							3						1						3		1	1								1				1
	GeLRR-RLK8								1			2					1	3							1	2			1		2								1	2			1
	GeLRR-RLK9						1			10	1	1					4	1					1	1					4		5	3		1		1				5					1
	GeLRR-RLK10								1	3						2	7	1		3			2	2	1				5														1
	GeLRR-RLK11					1				2						2								1		1					1					1			2	1			4				1
	GeLRR-RLK12									7		1												2		3						1					1	1
	GeLRR-RLK13									15							2			1						1			1			6					1	1
	GeLRR-RLK14								1	4		1					6	4								2			6		2	5		1			3	3	1	2		1			1				1
	GeLRR-RLK15									3						1	1									1			1		2	3				1	1	1		2			2	1			3	1	1
	GeLRR-RLK16					2				4								1					1			1					3	3	1			1			3	3					1
	GeLRR-RLK17											1					1								1	1					4		1	1			1	1	1	4							1
	GeLRR-RLK18									2						1	1	3					1			2			1																2
	GeLRR-RLK19						2			4								1						1								8
	GeLRR-RLK20									4						1		1		1	1		1									2					1	1				1
	GeLRR-RLK21				1	1	1			6		1				2	2	1					2						2			5				3	1	1
	GeLRR-RLK22									5				1				1					1																				1
	GeLRR-RLK23				1					2		1	1																			4		1		1	2	2								1
	GeLRR-RLK24					2	1		1	2						1										1					1	3			1					1			1
	GeLRR-RLK25				1	1				4						1	1									2			1		1			1			1	1		1				1
	GeLRR-RLK26	1	1						1	5		1					1												1		1	1								1								1
	GeLRR-RLK27									5						1	4	2					1	1		1			4		4		1	1					1	4									1
	GeLRR-RLK28					1											1	1							1	1			2		1	3				1				1
	GeLRR-RLK29					1				4							1		1				1			1			1		3	3					2	2		3		1		1			2
	GeLRR-RLK30	1								2							2	1					1	1		1			1	1	4	2	2				1	1		4			1
	GeLRR-RLK31					1			1	4						1	1			2	1								1		2	1				1			1	2			1
	GeLRR-RLK32						1			4					2			7					2			1					1	1					1	1		1								1
	GeLRR-RLK33								1	4							6	1								1			5			2		1									1
	GeLRR-RLK34									6						2	2									1			2		2	1		1			3	3		2
	GeLRR-RLK35									3							2	2		2			1						1		4	2					1	1		4							1
	GeLRR-RLK36					1				5						1		2		1												1				2	2	2	1				2
	GeLRR-RLK37					1				2				1		1	1								1	2			1		2	1								2
	GeLRR-RLK38									2							1									1			1		1	3					2	2	1	1
	GeLRR-RLK39				1			1		2						3	2			2					1	1			2		2						1	1		2			1		1
	GeLRR-RLK40						1			1							1	1					1			2			2		1	2					1	1	1	1			1		2
	GeLRR-RLK41			1						5		1			1		4						1			1			4		5						1	1		5
	GeLRR-RLK42					1				7					1	1	1					1				3			1		3	3								3				1
	total	2	1	1	5	16	9	1	9	167	2	10	2	8	4	23	75	38	1	17	2	1	19	13	8	39	1	0	67	1	66		9	11	1	15	29	29	15	66	1	3	19	6	9	1	8	4	4
GeLec-RLKs	GeLec-RLK1									8							3												3		1	4					2	2	1	1		1						1
	GeLec-RLK2									2							2							1	1				2		3	2							1	3
	GeLec-RLK3					1			1	2								3					1			1					1	1							1	1							1
	GeLec-RLK4								1	13						3		3		2			2	1								2				1			2				2
	GeLec-RLK5					1				3								7					1			1							1	1
	GeLec-RLK6																2						2			1			1		1								1	1
	GeLec-RLK7					2				2															1	2					1	2							1	1			1
	GeLec-RLK8				1	1				2				1			2			1			1						2		4	4								4
	GeLec-RLK9	1							1	4				1		1	4						1						3	1	3	3	1							3			1
	GeLec-RLK10									2					2						1					3					1	3		1						1							1
	GeLec-RLK11						1			5		1		1		2	2	2						1	1	1			2		2	5							3	2			1
	GeLec-RLK12								1	7	1																				1	4		1						1
	GeLec-RLK13					1				1						1										2						2							2					1	1
	GeLec-RLK14									4						1	1									1					1	6								1					1
	GeLec-RLK15									2	1					3	2	1	1							3			1			2											1
	GeLec-RLK16									17				1	1			4					2			1		1			1	3					1	1		1
	GeLec-RLK17					1				2							5	1		2						2			3			2											1
	GeLec-RLK18								1	7							1													1	1	2		1			1	1		1				2
	GeLec-RLK19						1		1	1		1		1	1	1	2	2		4			2		1	1			2		4	3	2			1				4			1					1
	GeLec-RLK20						1			3								2		1												6		1
	total	1	0	0	1	7	3	0	6	87	2	2	0	5	4	12	26	25	1	10	1	0	12	3	4	19	0	1	19	2	25	56	4	5	0	2	4	4	12	25	0	1	8	3	2	0	2	2	0
GeLYKs	GeLYK1									10				1			2							1		1			3				1				1	1									1
	GeLYK2						1			4						1		1								1										1	1	1							1		2
	total	0	0	0	0	0	1	0	0	14	0	0	0	1	0	1	2	1	0	0	0	0	0	1	0	2	0	0	3	0	0	0	1	0	0	1	2	2	0	0	0	0	0	0	1	0	3	0	0
GeLYPs	GeLYP1						1		1	6		1	1				2	1							1	1											1	1									1
	GeLYP2									1		2				1		1					1		1								1						1				2					1
	total	0	0	0	0	0	1	0	1	7	0	3	1	0	0	1	2	2	0	0	0	0	1	0	2	1	0	0	0	0	0	0	1	0	0	0	1	1	1	0	0	0	2	0	0	0	1	1	0
GeCNLs	GeaCNL1									11		1		1				2					1			2											3	3							1
	GeaCNL2					2				1								1			1		1								1		1	1		1				1			1				1
	total	0	0	0	0	2	0	0	0	12	0	1	0	1	0	0	0	3	0	0	1	0	2	0	0	2	0	0	0	0	1	0	1	1	0	1	3	3	0	1	0	0	1	0	1	0	1	0	0
	SUM	3	1	1	6	25	14	1	16	287	4	16	3	15	8	37	105	69	2	27	4	1	34	17	14	63	1	1	89	3	92	56	16	17	1	19	39	39	28	92	1	4	30	9	13	1	15	7	4
[truncated: 54 more columns]

## Sheet: Table S8
Table S8 : The FPKM (Fragments Per Kilobase of exon model per million mapped fragments) values of 68 GePRGs have been measured in the flowers and stems of six forms of Gastrodia elata.
Gene name	TMSG_1	TMSG_2	TMSG_3	TMQG_1	TMQG_2	TMQG_3	TMSB_1	TMSB_2	TMSB_3	TMQB_1	TMQB_2	TMQB_3	TMSR_1	TMSR_2	TMSR_3	TMQR_1	TMQR_2	TMQR_3
GeLRR-RLK1	14.7821	12.3349	11.5361	1.0643	0.977785	0.817651	6.37977	2.47043	2.28743	3.40562	3.19612	4.79809	8.07303	7.26885	8.66616	2.45054	5.68473	1.85519
GeLRR-RLK2	5.90495	5.22222	4.3193	28.955	13.4652	31.1462	12.2736	20.2102	21.0888	11.8481	13.1088	14.8483	15.8236	12.2566	15.206	14.5671	8.98179	11.506
GeLRR-RLK3	9.16953	11.6368	7.18183	2.57656	3.7156	2.49582	5.49578	6.75475	6.01542	4.83815	4.77625	4.28223	12.2247	12.6924	12.5707	2.53328	5.6068	3.39281
GeLRR-RLK4	0.766996	0.357338	0.357161	0.342205	0.791239	0.566245	0.332192	0.227485	0.44383	0.545696	0.586439	0.543911	0.727463	0.624019	0.729567	0.666703	0.840134	0.550613
GeLRR-RLK5	1.16339	1.71994	0.83326	0	0.324511	0.0740088	2.4162	2.47861	2.43638	0.97772	1.07307	0.995257	4.11282	3.47589	4.20028	0.152493	0.838521	0.16792
GeLRR-RLK6	2.87804	3.29663	1.74305	0.357471	0.231573	0.846769	2.22738	1.01804	1.03183	0.752632	0.635045	1.20027	5.1136	3.7386	3.91165	1.0913	2.98189	0.759413
GeLRR-RLK7	0.352462	0.877744	0.678717	0.405591	0.812758	0.997106	2.5592	2.93152	3.03273	0.887517	1.39172	1.08947	4.02364	2.16806	3.72877	0.538084	0.902209	0.919081
GeLRR-RLK8	9.93925	10.5029	7.83376	7.13613	4.77499	5.99896	5.93719	5.00314	5.38579	2.24971	2.05867	3.62406	6.1555	5.80478	6.17748	3.86753	6.77062	2.87356
GeLRR-RLK9	2.63844	3.80284	2.42838	0.300219	0.263302	0.544083	3.29321	1.01602	1.01576	1.2567	1.64991	4.86721	6.00571	4.31525	7.89922	0.605793	1.12234	0.724586
GeLRR-RLK10	7.53663	6.97542	3.92869	11.7397	7.3907	9.64451	3.66647	11.6217	12.5191	4.03232	4.25205	4.35491	6.30888	7.67712	5.52582	6.52113	11.373	5.73389
GeLRR-RLK11	2.32333	1.99875	1.06627	0.421285	1.52831	0.265561	4.28384	7.59968	8.43348	7.13789	6.84617	5.6749	9.92019	11.7041	8.91592	1.94933	2.77375	1.0309
GeLRR-RLK12	4.53507	5.01534	2.13068	0.278847	0.319447	0.210467	0.805654	1.17606	1.02207	1.40712	1.66862	1.8953	3.18227	3.17213	3.40287	0.398259	2.44846	0.562805
GeLRR-RLK13	0.64132	1.31125	0.496486	2.35234	0.352183	2.00799	0.626698	0.164273	0.134122	0.0451528	0.0200789	0.513059	0.500064	0.291578	0.54772	0.354634	0.94794	0.318918
GeLRR-RLK14	0.149122	0	0.0494763	0	0	0	0.0306783	0.57296	0.819763	0.545953	0.35483	0.502308	0.568463	0.898332	0.542297	0.725655	1.34014	0.699184
GeLRR-RLK15	93.7595	91.6311	53.2908	302.982	139.72	287.821	15.62	98.1639	98.1446	46.4686	42.2953	20.5657	31.84	39.4785	31.9386	68.8693	93.4346	74.9871
GeLRR-RLK16	15.5935	14.9177	13.5594	37.2253	17.0223	39.9686	4.67418	7.46689	7.58211	8.22966	7.71296	8.54369	6.86686	6.30188	7.43263	23.7685	27.3566	19.9779
GeLRR-RLK17	11.412	10.0941	12.2963	167.522	94.2716	157.602	24.1502	36.9925	39.8133	9.32216	8.54163	8.51986	16.4053	23.1661	13.8998	46.9219	111.128	40.2227
GeLRR-RLK18	1.12932	0.904049	0.279768	0.864055	1.79117	0.80462	1.21431	3.44042	3.67091	12.3146	11.3446	16.5552	0.821001	0.753056	0.756662	0.62171	1.42443	0.616146
GeLRR-RLK19	33.1934	35.5144	16.6252	75.0013	45.3819	73.5159	21.1011	39.8647	37.1977	17.2921	15.8319	17.3632	33.0598	27.7837	33.0931	43.9728	47.2319	46.6602
GeLRR-RLK20	2.7625	2.54866	1.69877	7.28219	2.41004	6.33395	8.12576	2.58955	2.67854	1.19181	1.17774	6.99549	4.07383	3.45617	3.16087	2.63483	7.00586	2.85049
GeLRR-RLK21	1.59078	2.13933	0.905949	0.763089	2.37281	0.366403	4.00243	1.81725	1.87049	1.13288	0.641173	1.25647	3.41334	1.82892	3.48191	4.85332	13.1805	5.75701
GeLRR-RLK22	8.39836	8.37479	6.15089	0.107171	0.733141	0.570851	4.96352	0.825128	0.801351	3.73986	3.55666	8.65843	0.774605	0.552949	0.709973	2.38475	3.09395	1.13954
GeLRR-RLK23	2.0713	2.21984	1.09956	21.2574	17.381	23.1795	2.50429	21.8918	23.9307	5.49227	6.20963	2.98404	4.1081	5.23019	3.77855	2.27432	3.10495	2.87954
GeLRR-RLK24	139.494	151.607	108.444	187.312	75.6885	188.486	22.7609	18.3388	18.0666	15.4806	15.3437	50.7045	31.6744	26.6829	30.7886	71.9577	164.443	73.064
GeLRR-RLK25	19.4883	20.1555	10.8833	6.95793	5.41424	6.47163	7.42577	5.38525	4.51037	5.74252	6.37614	7.5724	6.14473	6.59313	6.88075	4.55692	9.39011	6.55004
GeLRR-RLK26	42.5812	43.6711	34.5213	25.8064	35.6821	25.8759	13.7933	14.6244	13.3795	9.88953	9.13456	10.6216	24.7622	19.0067	26.1672	4.36802	7.38209	5.6342
GeLRR-RLK27	2.71999	3.71536	2.39262	0.861199	1.57272	0.756134	1.55257	1.80422	1.68352	2.10765	1.5752	2.05485	6.9888	4.70356	7.11066	2.44827	3.61421	2.16238
GeLRR-RLK28	0.0837262	0.0515577	0.207417	0.0655158	0.271627	0.0223701	3.00399	1.38972	1.63294	0.358406	0.285204	0.203059	2.36766	2.2383	2.55393	0.434589	0.649474	0.437769
GeLRR-RLK29	12.0759	10.99	6.43418	14.6614	15.1739	17.3133	2.74513	18.1322	16.345	17.1923	14.7389	2.87661	3.94602	3.36702	3.92614	9.366	12.6702	13.0246
GeLRR-RLK30	5.91763	6.46785	6.23219	0.909323	5.72754	0.525434	40.9433	48.89	45.1577	18.4076	15.601	10.069	34.514	50.7531	36.7238	3.9439	16.6926	4.93801
GeLRR-RLK31	14.5943	16.9691	12.7261	2.85184	2.60558	2.53174	9.34385	4.14906	4.8316	4.92665	4.75489	6.13272	11.0322	10.0009	10.4958	3.03822	5.50096	3.44291
GeLRR-RLK32	5.019	3.77164	2.12245	7.89912	2.36882	7.11402	2.77211	2.09184	1.90309	1.4566	1.61932	4.01164	5.31433	4.96603	5.17471	6.38244	5.89064	5.04733
GeLRR-RLK33	6.64348	6.65273	6.78475	0.627125	0.923699	1.01429	7.11226	3.74702	3.47214	2.62292	1.82564	3.97266	9.4139	6.74286	10.1631	0.477696	1.38861	0.661638
GeLRR-RLK34	7.19433	7.50395	7.63829	57.5186	37.6544	49.6529	15.5922	26.2218	30.7274	14.3876	12.7636	13.0045	20.7973	20.0372	21.6359	7.80043	20.3102	9.40863
GeLRR-RLK35	4.48592	2.95095	2.16744	14.9994	13.504	14.0256	6.45357	18.5154	18.4173	8.20727	7.52246	2.35768	7.93841	10.053	8.58275	15.2941	14.326	15.2606
GeLRR-RLK36	19.2313	15.9529	11.3332	59.6341	58.1662	63.058	19.796	34.0953	39.7597	28.2986	27.9205	14.4134	13.4562	14.6142	12.3676	57.7702	65.3633	56.2288
GeLRR-RLK37	4.45968	3.64637	3.19166	10.2623	7.01976	9.79712	4.71377	4.56935	6.46181	4.5326	4.03118	4.99403	6.37437	6.18194	5.7839	2.26807	5.10007	2.50075
GeLRR-RLK38	6.45251	6.30393	3.96696	26.3028	9.43793	27.5838	5.63656	16.4602	17.6051	5.70316	5.07225	4.25781	8.45524	9.98946	8.16816	30.877	26.5759	34.6213
GeLRR-RLK39	2.42254	2.34246	2.14336	3.70773	3.13938	2.70136	3.62459	3.40522	4.23016	1.37577	2.20645	2.10411	3.97796	4.47848	4.09492	0.897499	2.70837	0.910273
GeLRR-RLK40	0.551027	0.199598	0.301119	0.655224	0.153353	0.736121	0.280068	0.215868	0.325381	0.0365136	0.0162371	0.218365	1.79727	1.29684	1.57166	0	0.153314	0.221056
GeLRR-RLK41	12.6677	14.1187	16.034	4.56017	2.6739	4.64445	6.41245	2.80467	2.12037	8.12544	9.08825	10.0417	11.9837	9.30227	12.8765	5.35057	21.2075	7.60817
GeLRR-RLK42	0.735617	0.916756	1.14672	0.799473	0.16573	0.0701939	0.49004	0.0897271	0.251173	0.197303	0.140381	0.448378	0.728369	0.780384	0.741166	1.1364	2.73384	1.13476
GeLec-RLK1	31.6626	33.3782	23.7663	44.5258	23.7847	52.1719	10.4552	17.3188	14.1962	9.75962	10.4473	14.411	13.0208	11.025	12.5986	20.8886	21.1653	31.0909
GeLec-RLK2	257.452	287.865	227.504	496.01	427.574	545.662	71.025	53.6257	43.598	81.5602	77.2473	89.9452	52.2867	38.2716	50.7559	234.137	246.894	242.258
GeLec-RLK3	50.2855	50.5091	36.4985	140.879	123.115	130.088	26.632	89.8102	78.0261	39.4387	38.5344	73.0637	67.8452	75.127	74.0807	33.7328	32.6293	46.0068
GeLec-RLK4	0.665347	1.08119	0.566869	0.771311	0.866081	0.724241	0.223063	2.82784	2.73289	2.1375	1.87635	2.55661	0.728738	0.806672	1.15142	0.174422	0.862528	0.616217
GeLec-RLK5	0.0239093	0.0920193	0	0	0	0	0	0	0	0	0	0	0.0220955	0	0	0	0.0226179	0
GeLec-RLK6	0.138285	0.159664	0.265088	0	0	0.123157	0.512078	0.0708427	0.110172	0.18174	0.115454	0.52791	0.979754	0.712543	0.934657	0	0.0218026	0
GeLec-RLK7	5.77348	4.18162	3.80094	2.04544	1.22904	4.34226	2.13235	1.53709	0.91271	0.819379	0.728735	2.38884	3.61301	2.70761	2.50488	1.31391	2.25777	1.421
GeLec-RLK8	126.979	119.365	107.838	127.919	122.323	128.277	45.5181	78.0513	76.1463	84.4203	85.8975	83.3216	57.3728	52.7679	58.7743	52.3166	67.0144	61.273
GeLec-RLK9	61.9421	72.3367	65.5645	65.1851	44.2825	64.315	40.5059	44.4707	40.3989	14.537	15.8695	25.0923	33.4541	30.5243	33.9814	64.4951	77.0915	73.3016
GeLec-RLK10	5.23816	6.46337	6.3346	8.10161	17.9687	8.29877	4.05058	8.52245	5.58673	2.75765	2.37347	3.90128	3.18665	2.77647	3.06318	9.75035	9.51209	11.5189
GeLec-RLK11	2.08341	3.92738	2.18189	7.90184	5.37392	9.28695	1.45204	7.10099	6.5243	3.18516	2.06603	1.63273	2.61299	2.18443	2.99876	3.21014	2.43344	4.2046
GeLec-RLK12	2.35452	2.94921	1.81805	0.474561	1.3599	0.829246	1.42674	0.657934	0.532062	1.56731	1.43681	2.24954	1.99787	1.90742	2.73621	1.16154	2.18686	1.38679
GeLec-RLK13	4.52449	5.61803	4.92349	68.0303	45.2899	76.3919	1.19578	1.87799	1.37346	1.46952	1.55511	4.44977	0.427281	0.900907	0.815228	6.75948	8.13848	9.02797
GeLec-RLK14	1.4685	1.98277	3.17363	1.88378	0.846094	1.89746	3.24892	1.67728	1.58808	1.78986	1.37479	3.92482	4.5385	4.29053	5.28466	1.41997	3.621	2.0249
GeLec-RLK15	4.2376	6.90742	5.91459	4.63993	3.27765	5.23721	0.596731	1.09126	1.14824	0.638188	0.930845	5.16005	2.59679	2.20481	2.45729	1.71089	4.13735	1.72575
GeLec-RLK16	0.11232	0	0.0198752	0.146485	0	0.0300098	0.129401	0.184132	0.32215	0.151834	0.202556	0.12107	0.996475	0.551521	1.08924	0	0.297511	0.0766012
GeLec-RLK17	3.62791	4.51801	3.91442	4.19287	6.77799	5.12237	6.82037	6.165	5.47057	2.75778	3.19147	5.76247	10.7395	8.26061	7.69689	2.92278	6.47331	2.615
GeLec-RLK18	0.74841	0.966326	1.40976	0.314855	0.424249	0.322518	0.49667	1.11312	1.45411	1.03346	1.11263	1.59391	2.45418	2.17331	3.04359	0	0.570958	0.548825
GeLec-RLK19	7.81193	10.0443	6.4097	10.0173	3.24465	12.1268	5.53065	6.86381	7.38513	1.89276	1.59593	5.0864	10.5466	9.84163	10.9461	4.76225	4.78906	6.22552
GeLec-RLK20	0	0	0	0	0	0	0	0	0	0	0	0	0	0	0	0	0	0
GeLYP1	27.651	28.0445	30.7851	6.24776	12.9515	7.57871	15.6997	14.6822	15.307	11.2666	10.5676	10.8712	37.6699	33.588	32.4535	27.6621	19.4791	25.9365
GeLYP2	18.2911	13.7513	10.9918	2.43676	8.02017	3.19671	22.5508	12.6619	13.5071	7.68066	8.30885	7.72915	31.0806	27.8395	25.5175	2.6682	5.27157	5.06722
GeLYK1	30.0925	30.6619	22.1999	113.1	71.118	114.423	3.63956	8.38196	8.3463	13.5792	12.3666	13.6322	2.64472	2.02399	2.24266	13.3678	14.9583	15.3116
GeLYK2	0	0	0	2.38799	2.76879	3.02653	0.332001	0.985734	1.27583	0.104881	0.186558	0.961752	1.31929	1.77786	1.47745	0.256277	1.23305	0
GeCNL1	1.96612	1.60301	1.05288	5.51631	3.5145	4.25088	2.96976	2.86268	3.57392	2.05455	1.77543	2.91054	4.36312	3.57562	3.95703	1.12918	1.73757	1.27912
GeCNL2	6.30152	4.70421	6.68779	4.3284	1.87755	2.18757	3.47709	1.46807	2.2924	1.92701	1.59665	1.53657	2.2294	1.76819	1.52098	1.949	6.40377	1.71171

## Sheet: Table S9
Table S9 : The FPKM (Fragments Per Kilobase of exon model per million mapped fragments) values of 68 GePRGs have been measured in five developmental stages of dark red Gastrodia elata.
Gene name	TMMM-1	TMMM-2	TMMM-3	TMBM-1	TMBM-2	TMBM-3	TMJM-1	TMJM-2	TMJM-3	TMHJ-1	TMHJ-2	TMHJ-3	TMGS-1	TMGS-2	TMSG-3
GeLRR-RLK1	3.56852	3.54848	1.96162	5.01388	5.37035	5.12656	8.55441	10.6912	15.6889	8.30855	7.50058	8.98728	5.04668	4.88602	6.09054
GeLRR-RLK2	2.89328	2.43305	2.30253	8.10379	5.14764	7.45985	73.8731	66.0102	10.7276	16.2682	12.6473	15.7695	4.4541	4.46308	3.45005
GeLRR-RLK3	8.44207	7.84537	11.5873	4.35387	6.45364	9.80477	7.01891	5.79247	5.30808	12.5813	13.097	13.0365	4.27415	4.22963	3.86986
GeLRR-RLK4	4.61817	5.43348	3.59744	0	0	0.20663	0.0244341	0.049721	0.0613422	0.748686	0.643913	0.756602	0.457673	0.695714	1.05079
GeLRR-RLK5	2.49671	2.05947	2.47754	4.99208	4.30801	3.6297	1.25187	1.72862	2.07653	4.23281	3.5867	4.35592	0.465254	0.386454	0.345109
GeLRR-RLK6	1.58568	1.59761	2.21449	1.15777	0.611226	1.68361	2.84115	2.74304	3.34945	5.26279	3.85778	4.05659	0.345288	0.843549	0.434494
GeLRR-RLK7	8.15066	6.9965	8.42605	6.79728	6.8568	3.52334	1.60631	2.22169	3.17153	4.14103	2.23717	3.86694	1.77601	1.65897	1.02402
GeLRR-RLK8	5.33055	4.85001	4.10365	6.4903	6.03555	5.96795	3.6194	3.86741	2.92361	6.33508	5.98983	6.40639	3.57733	2.6716	3.14357
GeLRR-RLK9	41.1049	44.9104	18.6243	18.5112	14.75	21.1189	4.22293	6.84844	10.7632	6.18092	4.45282	8.19193	2.94448	2.87739	3.90021
GeLRR-RLK10	2.08914	2.27975	2.21861	0.781838	1.4301	2.05642	10.0926	11.3105	3.0448	6.49293	7.92186	5.73058	4.54724	3.69992	3.46775
GeLRR-RLK11	3.25618	3.02204	6.42416	3.01921	1.89249	2.09863	9.24977	7.23821	20.6164	10.2214	12.0772	9.2463	8.87413	7.06601	7.39685
GeLRR-RLK12	7.27961	7.14059	11.5493	0.355991	0.463278	0.714257	1.30779	1.52466	1.24261	3.27512	3.27325	3.52897	0.0992318	0.193941	0.240349
GeLRR-RLK13	2.58455	3.04434	4.61217	3.45815	2.69521	3.87766	2.74151	2.14756	10.1716	0.514653	0.300873	0.568016	3.15579	3.00987	2.14021
GeLRR-RLK14	0.116316	0.17921	0.401594	0	0	0	0	0	0	0.585048	0.926971	0.562392	2.41859	3.60258	2.73707
GeLRR-RLK15	4.46377	3.46169	5.864	4.57715	5.58552	7.87958	35.0438	32.3775	12.3172	32.7689	40.7371	33.1221	35.7109	33.6927	34.7767
GeLRR-RLK16	1.04029	1.3223	1.69673	0	0.0245115	0.365714	6.18416	5.47808	1.12189	7.0672	6.50278	7.70805	18.2708	18.778	17.0243
GeLRR-RLK17	12.4759	12.1907	16.6165	25.9819	22.071	29.1385	23.3278	14.8574	18.423	16.8997	23.9046	14.4149	4.2455	3.42992	3.83067
GeLRR-RLK18	1.65997	2.30178	2.81645	2.53325	1.40509	0.786156	0.182281	0.593479	0.671176	0.844954	0.777063	0.7847	6.44922	5.98716	5.94962
GeLRR-RLK19	3.47186	3.95229	4.89661	17.3772	13.9632	27.0862	27.0002	23.8265	7.73835	34.0243	28.6694	34.3194	8.55752	8.55992	8.71784
GeLRR-RLK20	2.26175	3.4282	2.72449	19.1571	12.6901	9.86806	3.79481	2.9923	8.11774	4.19268	3.56635	3.278	2.34466	1.83299	3.21685
GeLRR-RLK21	16.0499	16.2257	17.0109	5.38993	6.59916	10.1642	16.2913	19.8637	18.8383	3.51292	1.88722	3.61093	0.806182	0.315125	0.488162
GeLRR-RLK22	9.26427	9.74921	13.568	10.1856	9.49504	11.256	16.7323	16.4575	25.9067	0.797204	0.570577	0.736281	10.1655	7.95114	9.01691
GeLRR-RLK23	3.74496	3.64576	3.10504	20.3676	23.1109	3.89836	2.43029	3.13994	0.306678	4.22796	5.39693	3.91856	1.0437	1.23567	1.27613
GeLRR-RLK24	18.9393	17.712	16.9046	14.4299	11.8013	7.14275	67.4196	55.083	26.5533	32.5984	27.5569	31.9295	45.6762	44.2667	44.0362
GeLRR-RLK25	34.2137	38.2185	29.4101	16.7545	14.5122	20.4207	14.4311	14.7804	18.7803	6.324	6.80332	7.13571	3.66951	3.37152	3.99412
GeLRR-RLK26	34.9683	33.2826	32.5759	79.0621	68.4861	19.4011	13.6158	13.8779	8.34902	25.4846	19.6126	27.1368	17.1529	16.3454	16.2896
GeLRR-RLK27	12.6234	13.4077	29.054	4.47634	3.15003	4.03997	11.4769	10.0118	1.44941	7.19269	4.8535	7.37415	3.05011	2.96125	2.95925
GeLRR-RLK28	9.70029	7.3895	7.51052	3.75624	1.9762	1.64568	0	0.103125	0.1866	2.40488	2.30966	2.64857	0.632829	0.886386	0.759998
GeLRR-RLK29	0.485712	0.320718	0.947379	0.0479678	0.686665	1.29772	4.96711	4.43749	5.10291	4.06114	3.47436	4.07163	5.88321	5.70809	5.78893
GeLRR-RLK30	16.4365	18.7523	21.6397	38.2526	38.5177	42.1134	9.67417	8.76403	10.4683	35.5209	52.3711	38.0846	16.4631	16.286	17.8272
GeLRR-RLK31	30.0364	30.2425	33.2477	64.3541	70.8182	25.6029	6.07863	6.14482	5.21811	11.3541	10.3197	10.8848	5.65212	4.98495	4.56229
GeLRR-RLK32	4.14046	3.84391	3.79877	1.7125	1.26075	2.00298	49.492	40.1086	3.01621	5.46937	5.12435	5.36646	0.900156	0.691149	1.40809
GeLRR-RLK33	8.97551	10.0613	6.50593	2.80217	2.34429	1.78772	6.00495	3.75625	2.56386	9.68854	6.95782	10.5397	2.8534	3.02205	3.02365
GeLRR-RLK34	12.5264	12.2325	17.7955	42.1004	48.8527	61.3696	14.9328	16.1891	23.9609	21.4348	20.6759	22.4376	19.3884	16.3792	15.3657
GeLRR-RLK35	3.88784	4.09872	5.57698	2.17302	2.31393	3.12671	2.94633	3.01734	5.62415	8.17001	10.3735	8.90078	1.70332	1.95824	1.76248
GeLRR-RLK36	29.9297	26.7763	33.5128	18.8634	19.3688	16.4707	19.4975	17.0673	17.1686	13.8488	15.0801	12.8258	9.56061	8.15906	9.21421
GeLRR-RLK37	5.73065	4.97362	7.55064	14.45	12.2398	11.9514	9.71768	7.22626	7.58999	6.56034	6.37902	5.99823	6.24215	5.24593	5.29168
GeLRR-RLK38	3.11445	2.4337	4.2126	5.37663	3.74618	10.2133	59.4649	46.7475	4.99469	8.70192	10.3079	8.47083	1.62567	2.13854	2.62817
GeLRR-RLK39	2.54029	1.50138	2.7449	3.16677	3.43429	2.23406	2.81145	2.58926	4.40123	4.09402	4.62125	4.24666	2.11855	1.57735	2.03115
GeLRR-RLK40	0.539365	0.436278	0.539618	0.675818	0.355841	0.69683	9.88807	7.40575	0.640306	1.8497	1.33818	1.6299	0.0816635	0	0.043268
GeLRR-RLK41	19.9073	23.5511	21.778	22.6398	16.5884	9.18415	3.53141	2.46099	4.97935	12.3333	9.59882	13.3537	1.73673	1.64796	1.65365
GeLRR-RLK42	3.89811	4.49598	4.30516	7.35399	5.52804	1.66751	3.35001	2.00625	1.86303	0.749619	0.805262	0.76863	0.661907	0.840872	1.07548
GeLec-RLK1	5.3644	7.10575	6.95363	1.95857	2.23684	6.58335	26.2468	24.0097	8.34691	13.4007	11.3765	13.0655	15.1893	13.0565	15.9466
GeLec-RLK2	44.0249	48.898	31.5834	119.648	81.499	35.2985	156.285	136.689	64.0673	53.8122	39.4917	52.6366	91.4804	93.8105	99.4615
GeLec-RLK3	7.33003	7.74409	7.60639	13.7334	12.9484	18.8185	42.9389	58.0385	43.8889	69.8246	77.522	76.8258	45.7697	43.9477	48.3086
GeLec-RLK4	0.153771	0.189533	0.096529	0	0.27053	0.605452	9.12836	8.34677	0.773882	0.749999	0.832389	1.19408	0.558767	0.849388	0.690791
GeLec-RLK5	0.0497318	0.0689602	0.0234142	0	0	0	0.0289436	0	0	0.0227401	0	0	0	0	0
GeLec-RLK6	0.862905	0.465321	0.925379	0	0.0948822	0.0235942	2.20412	0.652906	0	1.00834	0.735259	0.969291	0.1742	0.283717	0.0615311
GeLec-RLK7	1.89118	1.61714	1.73625	0.392214	0.343114	0.302504	5.03549	4.31147	0.736856	3.71842	2.79392	2.5977	1.43169	1.81878	1.54745
GeLec-RLK8	17.8132	18.5429	16.1555	58.0832	53.9996	19.0989	67.3719	60.7487	66.5297	59.0697	54.4501	60.9522	171.999	177.995	181.808
GeLec-RLK9	18.4209	19.2506	15.3301	25.2021	22.1532	41.5319	12.7425	14.5439	15.397	34.4301	31.4974	35.2406	30.9398	28.3867	33.5965
GeLec-RLK10	18.2869	18.5246	14.8736	2.53594	2.3479	4.76961	7.77503	9.11031	6.26646	3.27962	2.86499	3.17668	5.8028	3.72638	3.79483
GeLec-RLK11	6.12446	5.4981	6.80786	5.38022	3.55919	9.5978	9.62516	8.43153	6.09487	2.68923	2.25407	3.10988	1.60685	1.17767	2.10002
GeLec-RLK12	2.31516	2.55178	2.70404	0.369342	1.08681	0.986066	3.34261	4.11278	5.03068	2.05616	1.96823	2.8376	1.77962	1.68637	1.62865
GeLec-RLK13	1.64865	1.98445	2.34477	0	0.13596	0.118332	1.05945	1.03727	0.736038	0.439747	0.929628	0.845437	7.13488	4.39072	7.27403
GeLec-RLK14	6.2843	7.5221	6.05887	1.38466	2.04823	4.60861	3.38057	3.58783	2.65828	4.67091	4.42731	5.48048	4.30633	2.93389	3.27784
GeLec-RLK15	10.4169	11.3944	7.523	0.749452	1.18169	0.0695958	4.1423	3.68428	0.895306	2.67255	2.2751	2.54834	0.570929	0.697399	0.453745
GeLec-RLK16	4.67258	5.70168	5.21374	0.161509	0	0	0	0	0.0227571	1.02555	0.569103	1.1296	0.367879	0.470111	0.149934
GeLec-RLK17	6.65655	5.04757	3.7261	5.68321	4.97849	10.1153	27.9576	19.5813	23.8741	11.0528	8.52395	7.9821	3.9385	3.08627	4.96095
GeLec-RLK18	4.06753	3.48161	5.2486	0.763727	0.993894	1.77948	3.03947	3.92511	1.34514	2.52578	2.2426	3.15637	1.36856	1.0699	1.03126
GeLec-RLK19	2.29211	2.74826	3.31223	1.16095	2.93456	4.62412	13.789	14.1372	5.23905	10.8543	10.1554	11.3517	1.4294	1.10134	0.990369
GeLec-RLK20	0	0	0	0	0	0	0	0	0	0	0	0	0	0	0
GeLYK1	45.4567	44.4949	56.0231	0.332534	0.0793376	0.680642	2.55457	3.06201	1.3178	2.77687	2.08851	2.32576	15.8406	13.0598	16.94
GeLYK2	9.74747	12.8001	10.3941	3.3023	2.89599	4.86095	9.76802	10.6648	3.67842	1.35778	1.83453	1.5322	0.312759	0.19102	0.704268
GeLYP1	28.1455	25.3721	25.4736	34.8053	25.3734	33.8997	12.26	12.3704	24.1803	38.7289	34.6588	33.6561	6.723	7.29404	7.79727
GeLYP2	26.8298	28.7416	23.4979	30.9676	23.1661	19.1948	19.3647	14.3733	18.6293	31.9873	28.727	26.463	4.37708	5.24579	4.81327
GeaCNL1	1.88336	2.05193	2.54611	2.32496	1.72179	2.89998	8.23645	6.73921	5.30702	4.46581	3.68961	4.10366	2.11829	1.48086	1.81301
GeaCNL2	3.01073	2.93782	4.45289	3.15353	3.10986	1.52669	1.18585	1.26057	3.02153	2.29445	1.82456	1.57734	1.98914	1.58385	1.81507
